# Supplementary material for: Space-Time Dependence of Emotions on Twitter after a Natural Disaster
Source: MDPI journal article supplement (doi:10.3390/ijerph18105292), 2021-05-16
Supplement: s1 [file s1]

**Table S1.** Global univariate Moran's I for all exposure variables used in the study. SD=Standard Deviation, CT= Census Tract. Significance values: \*\*\* < 0.001, \*\* < 0.01, \* < 0.05, .<0.1.

| Census tract level exposure    | Variable                      | Moran's I  | z-value | SD     |
|--------------------------------|-------------------------------|------------|---------|--------|
| Socio-economic status          | Unemployment rate             | 0,2451 *** | 18.9995 | 0.0130 |
| Flooding                       | >50% flooding in CT           | 0.5442 *** | 44.3084 | 0.0123 |
|                                | ≤50% flooding in CT           | 0.1993 *** | 16.2114 | 0.0124 |
|                                | No flooding in CT             | 0.6252 *** | 50.2807 | 0.0125 |
| Degree of building destruction | Affected buildings            | 0.3385 *** | 27.3170 | 0.0124 |
|                                | Minor building destruction    | 0.4173 *** | 32.8457 | 0.0127 |
|                                | Major building destruction    | 0.2613***  | 22.0999 | 0.0118 |
|                                | Destroyed building structures | 0.0542***  | 4.4349  | 0.0122 |

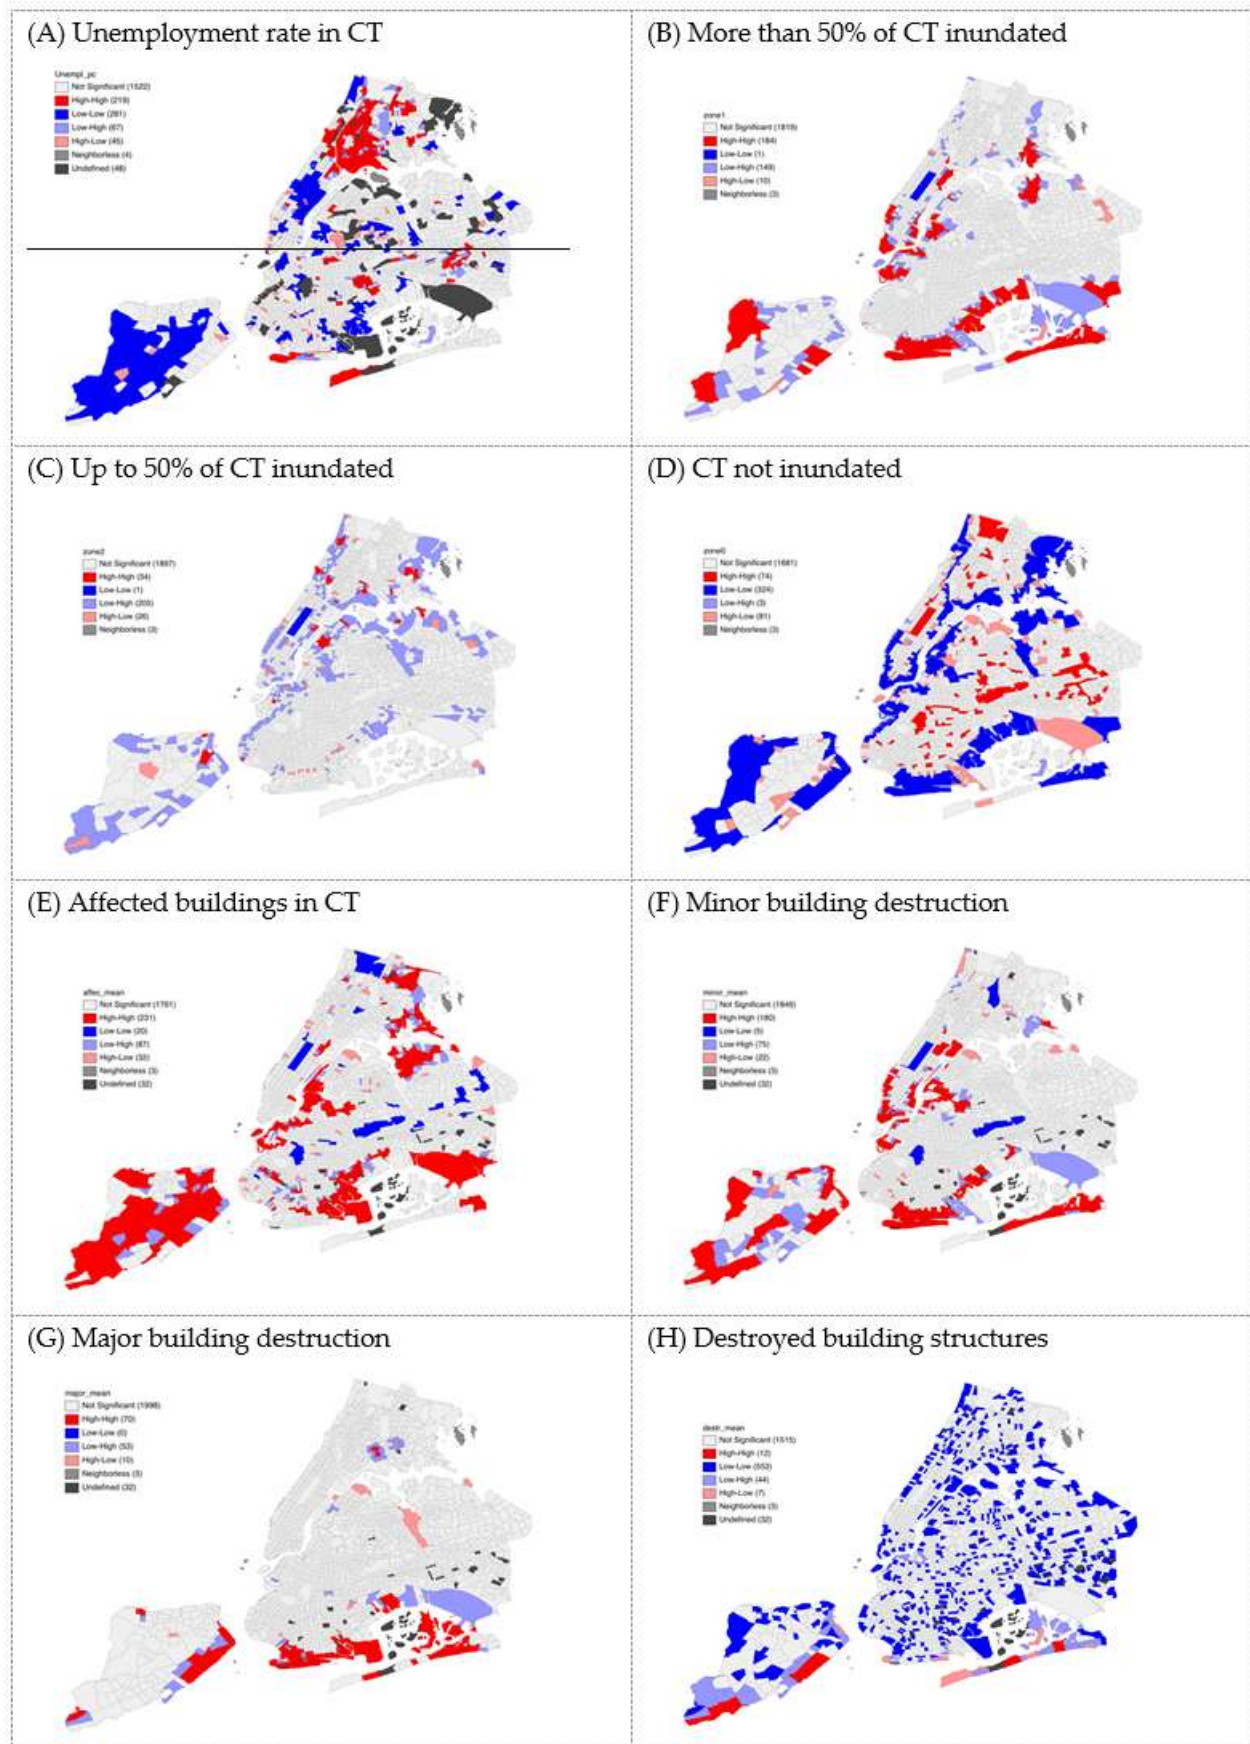

**Figure S1.** Local spatial associations (spatial clusters) of all exposure variables used in the study.
